# Supplementary material for: Molecular Detection of Rickettsia and Other Bacteria in Ticks and Birds in an Urban Fragment of Tropical Dry Forest in Magdalena, Colombia
Source: MDPI journal article supplement (doi:10.3390/life13010145), 2023-01-04
Supplement: s1 [file s1]

**Table S1.** Primers used for the molecular identification of ticks and Rickettsia.

| Biological group | Gene    | Amplicon (pb) | Primer             | Primer sequence (5'-3')                                                   | Temperature (°C) | Reference                   |
|------------------|---------|---------------|--------------------|---------------------------------------------------------------------------|------------------|-----------------------------|
| Ticks            | COI     | 710           | LCO1490            | GGT CAA CAA ATC ATA AAG ATA TTG G                                         | 45               | (Folmer et al., 1994)       |
|                  |         |               | HCO2198            | TAA ACT TCA GGG TGA CCA AAA AAT CA                                        |                  |                             |
| Rickettsia       | 16SrRNA | 460           | 16S+1<br>16s-1     | CCG GTC TGA ACT CAG ATC AAG T<br>GCT CAA TGA TTT TTT AAA TTG CTG T        | 48               | (Mangold et al., 1998)      |
|                  | GltA    | 401           | CS-78<br>CS-323    | GCAAGTATCGGTGAGGATGTAAT<br>GCTTCCTTAAAATTCAATAAATCAG GAT                  | 54               | (Labruna et al., 2004a)     |
|                  | ompA    | 444           | OMPA-F<br>OMPA-R   | CAC YAC CTC AAC CGC AGC<br>AAA GTT ATATTCCT AAA CCY<br>GTA TAA KTA TCR GC | 52               | (Phan et al., 2011)         |
|                  | Sca1    | 488           | SCA1-F2<br>SCA1-R2 | GGTGATGAAGAAGAGTCTC<br>CTCTTTAAAATTATGTTCTAC                              | 49               | (Anstead and Chilton, 2013) |

**Table S2.** Blood samples from birds and ticks from vegetation processed by 16S metataxonomy amplicon sequencing.

| Biological group | Species                         | month | Sample code |
|------------------|---------------------------------|-------|-------------|
| Birds            | <i>Campylorhynchus griseus</i>  | -     | DLM1        |
|                  | <i>Crotophaga ani</i>           | -     | DL151       |
|                  | <i>Furnarius leucopus</i>       | -     | DLM2        |
|                  | <i>Cyclarhis gujanensis</i>     | -     | DLM3        |
|                  | <i>Glaucidium brasilianum</i>   | -     | DL241       |
|                  | <i>Hypnelus ruficollis</i>      | -     | DLM4        |
|                  | <i>Melanerpes rubricapillus</i> | -     | DL88        |
|                  | <i>Leptotila verreauxi</i>      | -     | DLM5        |
|                  | <i>Parkesia noveborasensis</i>  | -     | DLM6        |
|                  | <i>Quiscalus lugubris</i>       | -     | DLM7        |
|                  | <i>Saltator coerulescens</i>    | -     | DLM8        |
| Ticks            | <i>Amblyomma dissimile</i>      | Feb   | ES2N        |
|                  | <i>Amblyomma dissimile</i>      | Feb   | ES2L        |
|                  | <i>Amblyomma dissimile</i>      | Mar   | ES3N        |
|                  | <i>Amblyomma dissimile</i>      | Mar   | ES3L        |
|                  | <i>Amblyomma dissimile</i>      | Mar   | ES3A        |
|                  | <i>Amblyomma dissimile</i>      | Abr   | ES4N        |

|                            |     |       |
|----------------------------|-----|-------|
| <i>Amblyomma dissimile</i> | Abr | ES4L  |
| <i>Amblyomma dissimile</i> | May | ES5N  |
| <i>Amblyomma dissimile</i> | May | ES5L  |
| <i>Amblyomma dissimile</i> | Jun | ES6N  |
| <i>Amblyomma dissimile</i> | Jun | ES6L  |
| <i>Amblyomma dissimile</i> | Jul | ES7N  |
| <i>Amblyomma dissimile</i> | Jul | ES7L  |
| <i>Amblyomma dissimile</i> | Ago | ES8N  |
| <i>Amblyomma dissimile</i> | Ago | ES8L  |
| <i>Amblyomma dissimile</i> | Oct | ES10L |
| <i>Amblyomma dissimile</i> | Oct | ES10N |
| <i>Amblyomma dissimile</i> | Nov | ES11L |
| <i>Amblyomma dissimile</i> | Nov | ES11N |
| <i>Amblyomma dissimile</i> | Dic | ES12N |
| <i>Amblyomma dissimile</i> | Dic | ES12L |
| <i>Amblyomma dissimile</i> | Ene | ES1N  |
| <i>Amblyomma dissimile</i> | Ene | ES1L  |
| <i>Amblyomma dissimile</i> | Ene | ES1A  |
| <i>Amblyomma dissimile</i> | Feb | 2ES2N |
| <i>Amblyomma dissimile</i> | Feb | 2ES2L |
| <i>Amblyomma dissimile</i> | Feb | 2ES2A |

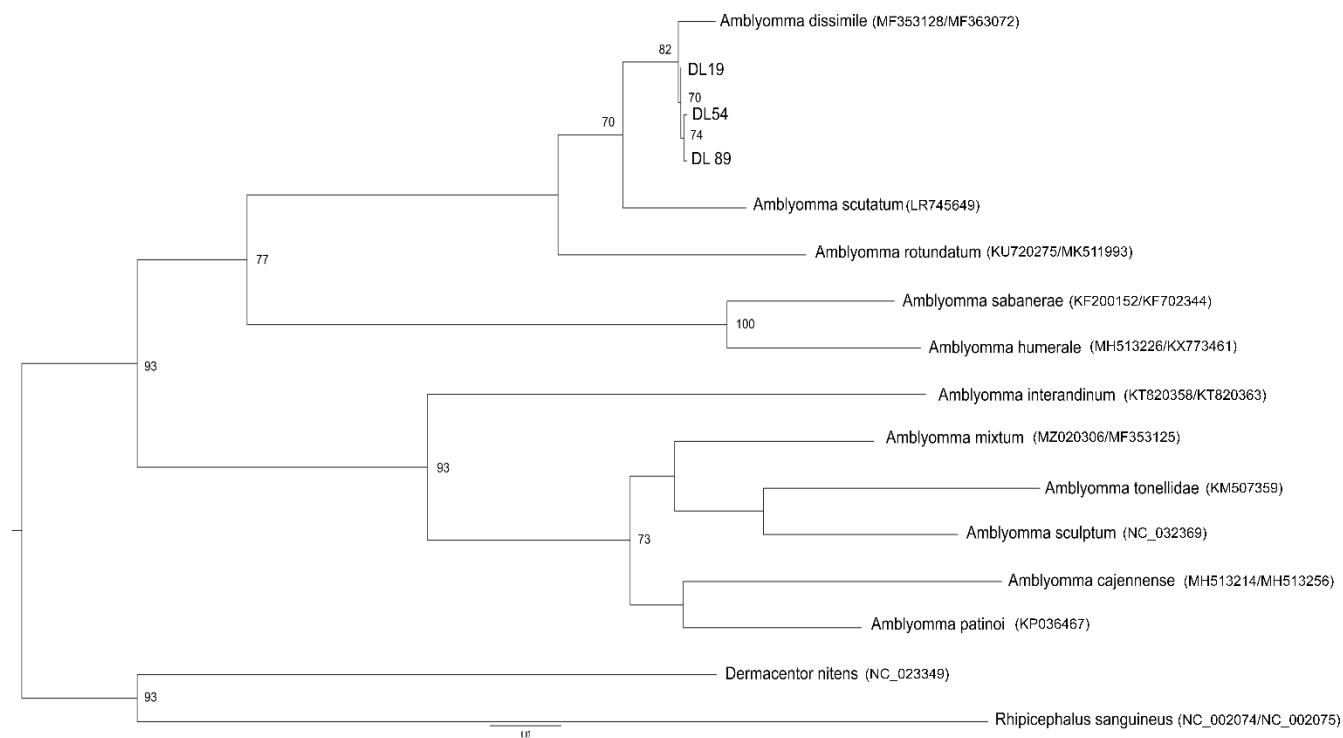

**Figure S1.** Phylogenetic reconstruction using maximum likelihood of the concatenated COI and 16S rDNA *Amblyomma* sequences obtained in this study and others downloaded from genbank with accession numbers included COI/16S. Numbers on the nodes correspond to bootstrap values.

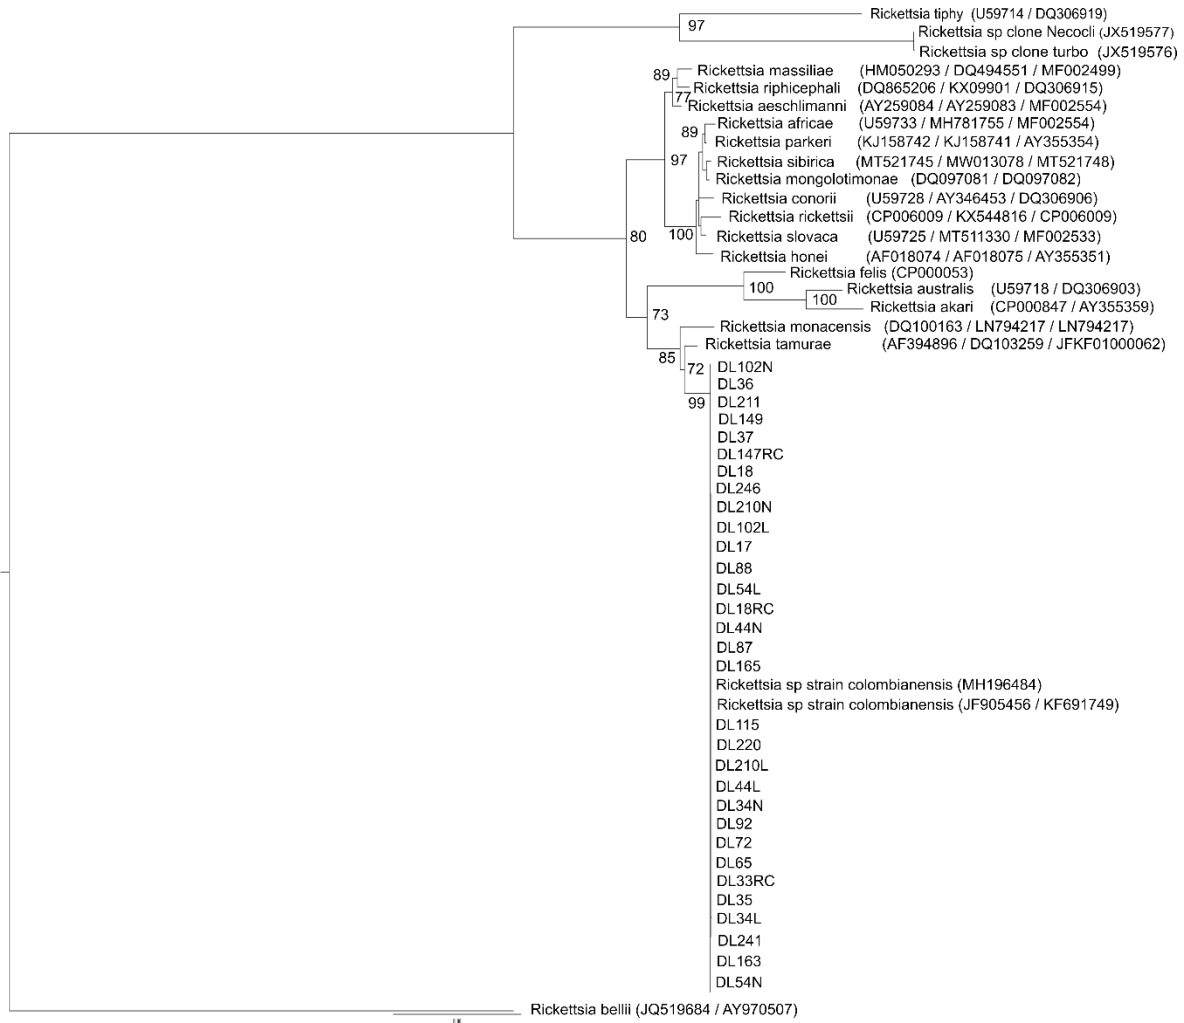

**Figure S2.** Phylogenetic reconstruction using maximum likelihood of concatenated GltA, OmpA and Sca1 genes for *Rickettsia*, including our sequences and sequences downloaded from genbank (with accession numbers included GltA/OmpA/Sca1). Numbers on nodes correspond to bootstrap values.

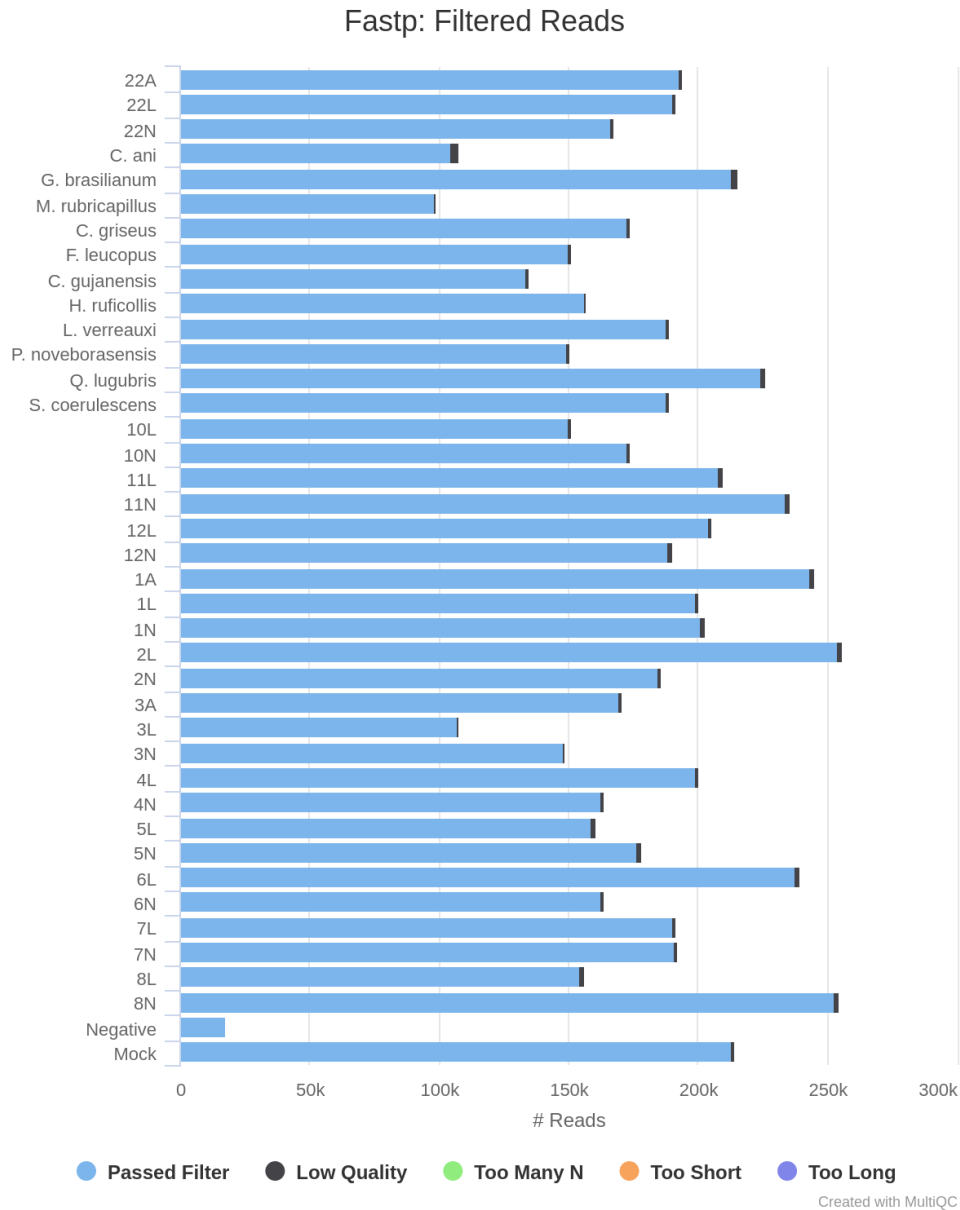

**Figure S3.** Number of reads for all samples. For the blood of birds' samples, the scientific name of the host where it was isolated is used. For the vegetation ticks' samples, the number represents the month of collection (1-12 for all samples taken in 2021, 22 for the February 2022 samples), and the letter represents the ticks' life stage: (L)arva, (N)ymp, (A)dult.

A) Alpha diversity between Mes\_a (shannon)

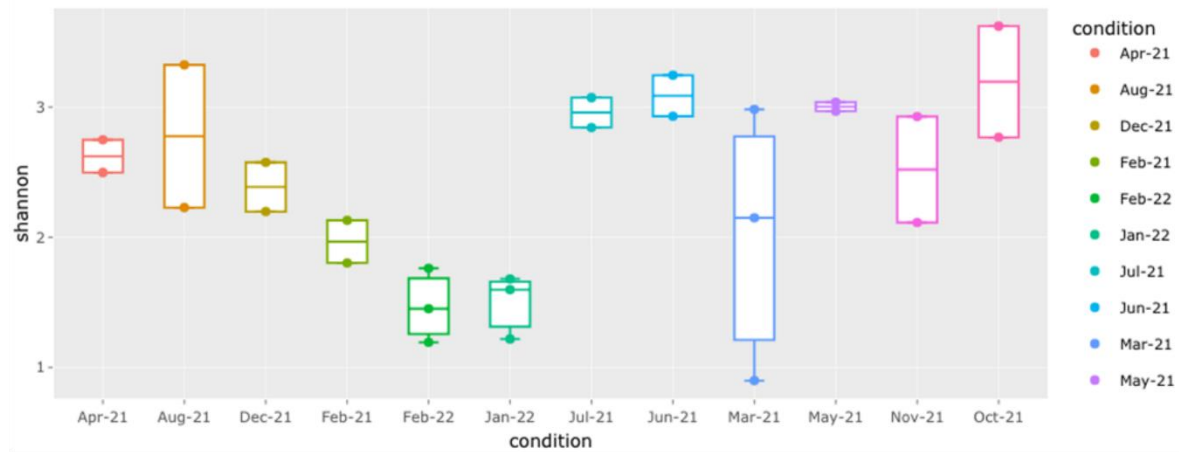

B) Alpha diversity between Estado (shannon)

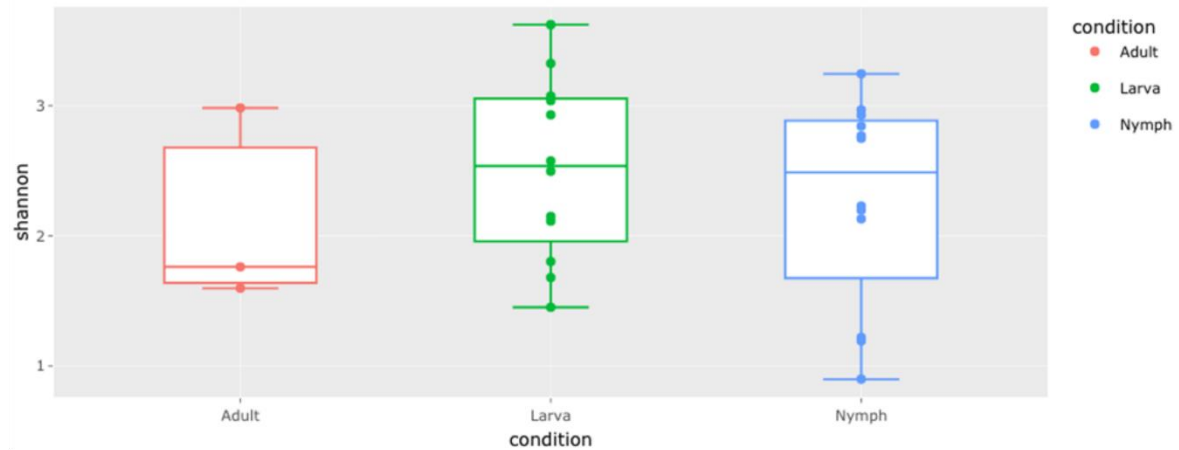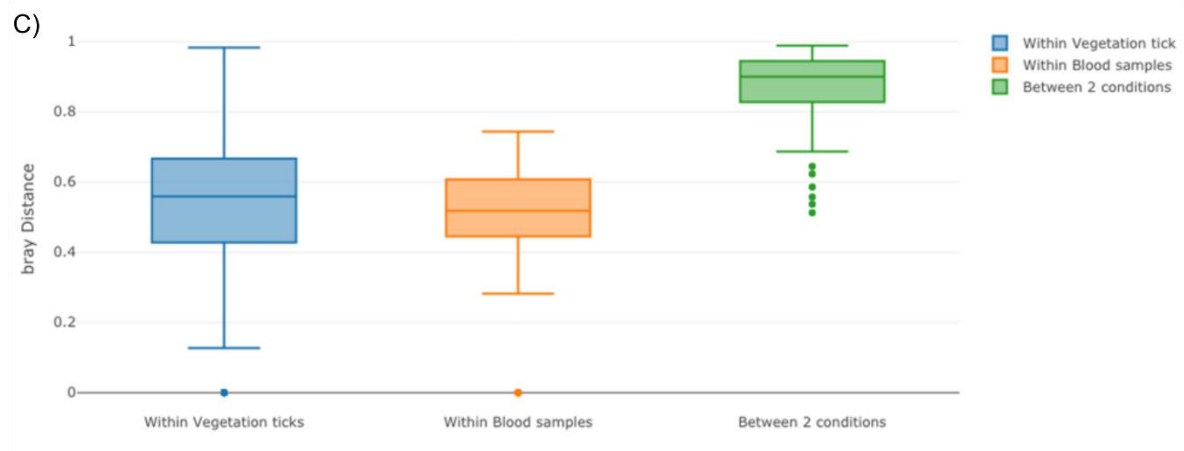

**Supplementary Figure S4.** Alpha diversity analysis based on Shannon index showed no significant differences (Kruskal-Wallis's rank sum test,  $P < 0.05$ ) between A) Ticks life stage and B) vegetation ticks and blood samples. PERMANOVA test using Bray distance did showed significant beta diversity difference existing between vegetation ticks and blood samples ( $P < 0.05$ ).
